# Supplementary material for: Coarse mode mineral dust size distributions, composition and opticalproperties from AER-D aircraft measurements over the TropicalEastern Atlantic
Source: Copernicus journal article supplement (doi:10.5194/acp-2018-739), 2018-08-06
Supplement: Supplementary file 1 [file acp-2018-739-supplement.pdf]

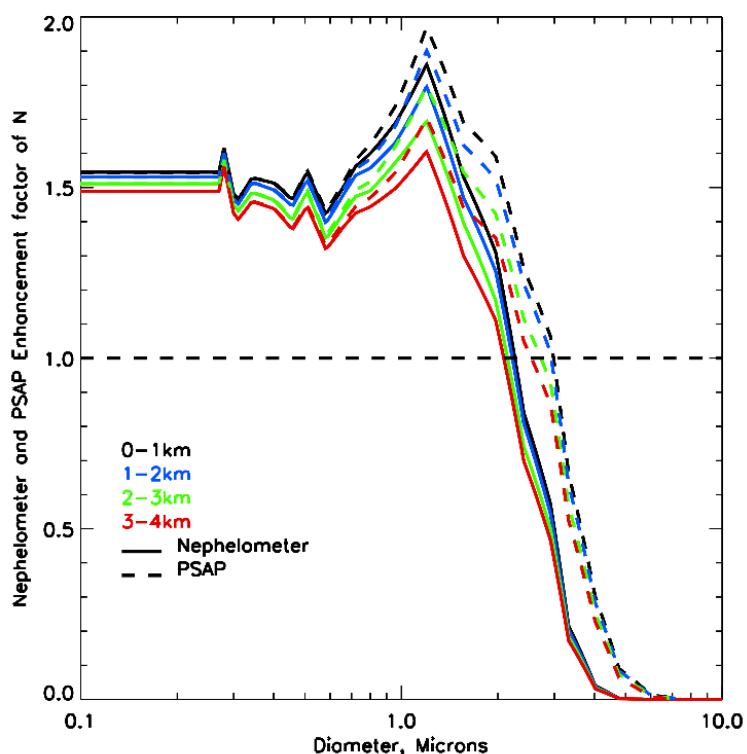

Fig S1: Inlet and pipe loss enhancement factor vs diameter for the nephelometer and PSAP behind Rosemount Inlets on the Bae146 FAAM research aircraft. Data from Trembath (2012).

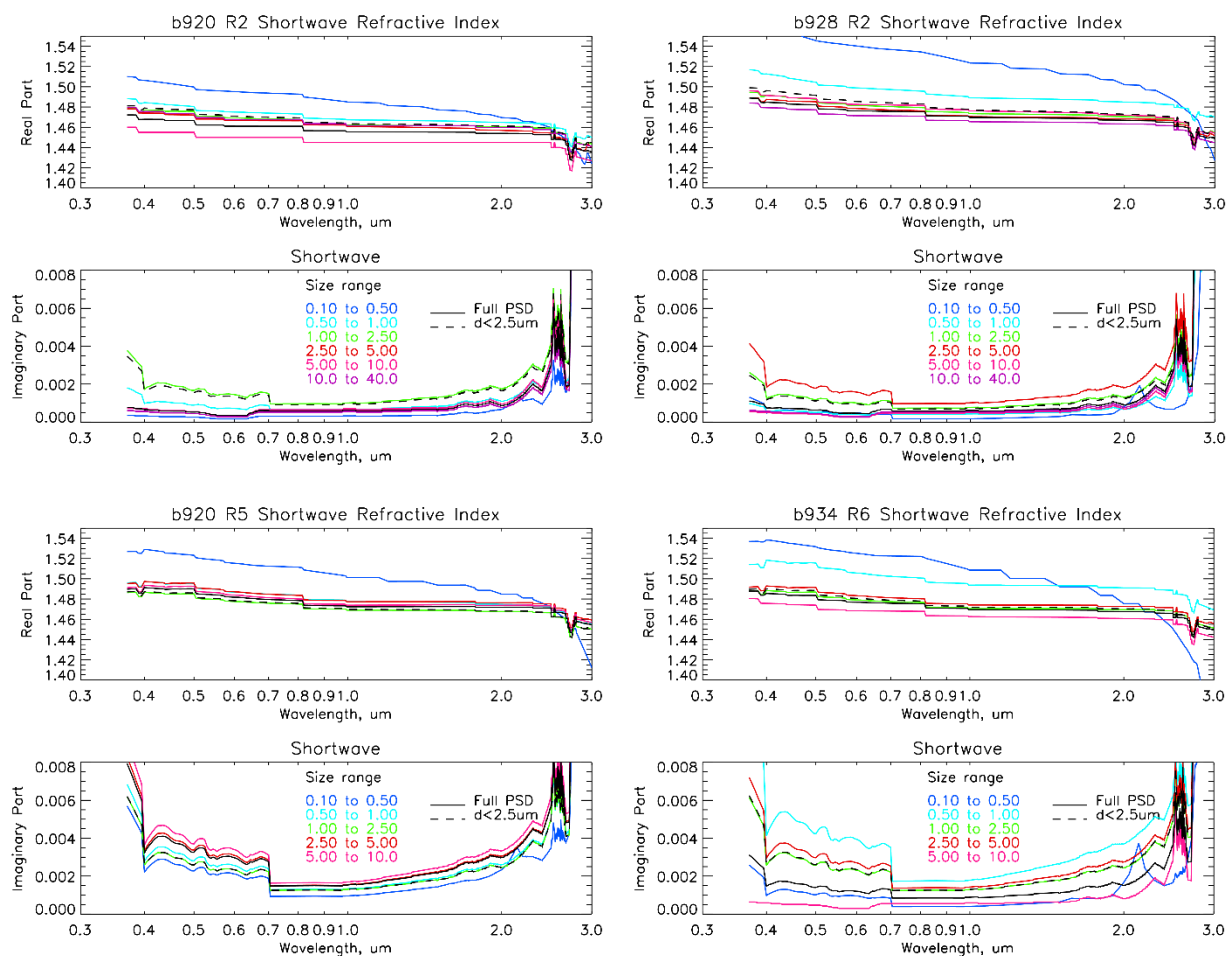

Fig S2: Spectral Shortwave refractive indices derived from filter samples, for flight legs in the MBL (top) and SAL (bottom).

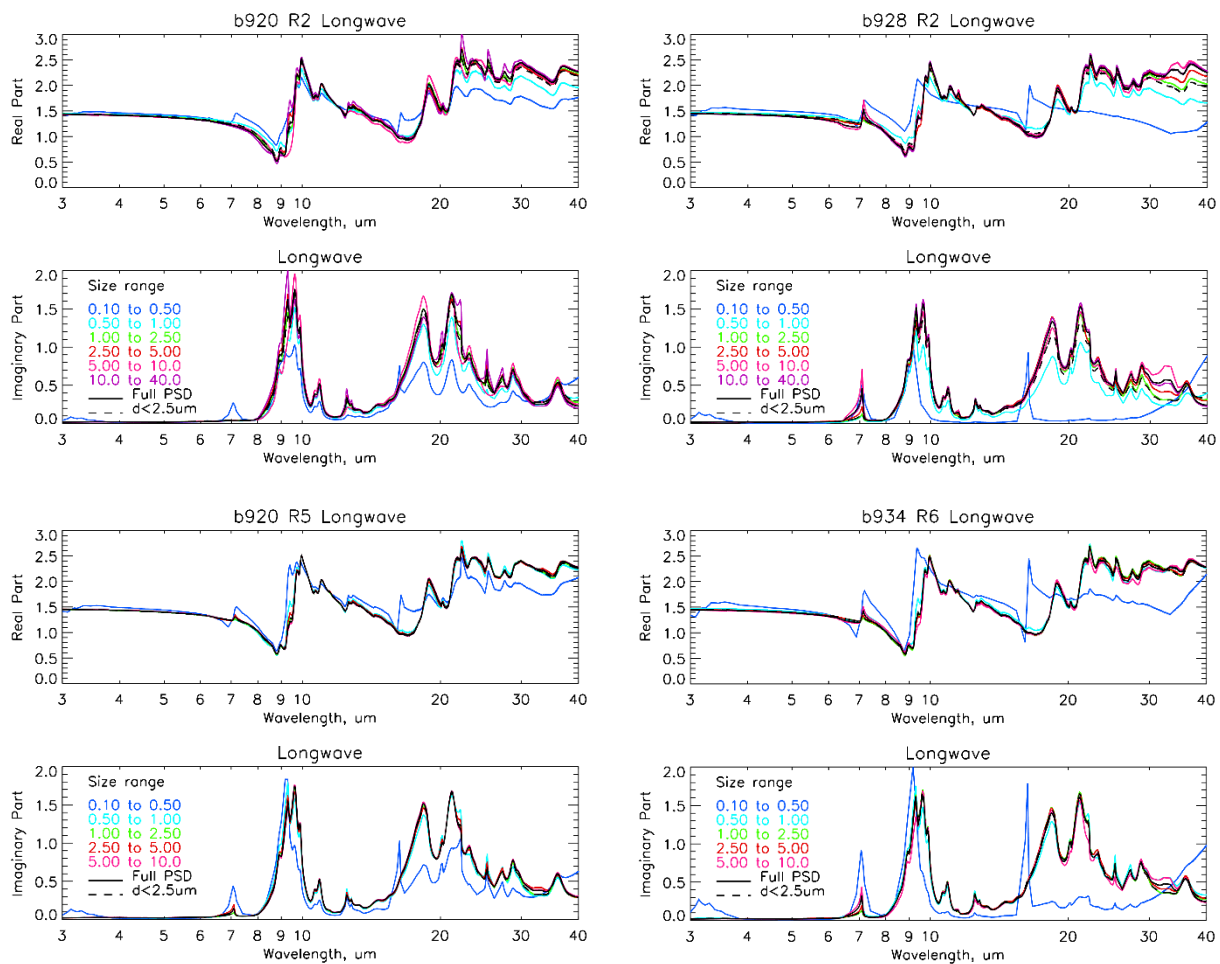

Fig S3: Spectral longwave refractive indices derived from filter samples, for flight legs in the MBL (top) and SAL (bottom).
